# Supplementary material for: Navigating Digital Demands: A Reassessment of Resources for Healthcare Workers’ Workplace Wellbeing
Source: Research Square preprint supplement (doi:10.21203/rs.3.rs-6448853/v1), 2025-05-13
Supplement: Supplementary file 2 [file c620e96c8ec9f429863e5713.docx]

**Table 1** Measurement instruments details

| **Construct** | **Sub-construct** | **Number of items** | **Example of items** | **Source** |
| --- | --- | --- | --- | --- |
| **Digital job demands** | System overload | 4 items | “Poor user interface design in digital tools often reduces my productivity in daily work.” | (49) |
| Work overload | 3 items | “Digital tasks increase my workload.” | (51) |
| **Resources** | Digital innovation support | 5 items | “The digital technology support team is available at work when I need it.” | (77) |
| Psychological resilience | 6 items | “I tend to bounce back quickly after hard times.” | (70) |
| Autonomy | 5 items | “The job allows me to plan how I do my work.” | (66) |
| **Employee work wellbeing** | Job satisfaction | 4 items | “I’m enthusiastic about my job” | (78) |
| Thriving at work | 9 items | “I feel alive and vital (V).” “I find myself learning often. (L)” | (44) |

Table 2 Measurement model results

|  |  | **Factor loading** | **Mean** | **SD** | | **CR** | **AVE** | | | |
| --- | --- | --- | --- | --- | --- | --- | --- | --- | --- | --- |
| Digital work overload | |  | 4.68 | 1.45 | | 0.89 | 0.73 | | |
| demwork1 | | .86 |  |  | |  |  | | |
| demwork2 | | .77 |  |  | |  |  | | |
| demwork3 | | .91 |  |  | |  |  | | |
| Digital system overload | |  | 4.55 | 1.28 | | 0.82 | 0.53 | | |
| demsys1 | | .60 |  |  | |  |  | | |
| demsys2 | | .81 |  |  | |  |  | | |
| demsys3 | | .81 |  |  | |  |  | | |
| demsys4 | | .65 |  |  | |  |  | | |
| DI support |  |  | 4.56 | 1.27 | | 0.87 | 0.59 | | |
| icts1 | | .84 |  |  | |  |  | | |
| icts2 | | .85 |  |  | |  |  | | |
| icts3 | | .87 |  |  | |  |  | | |
| icts4 | | .66 |  |  | |  |  | | |
| icts5 | | .61 |  |  | |  |  | | |
| Psychological resilience |  |  | 4.25 | 1.28 | | 0.93 | 0.72 | | |
| res1 | | .78 |  |  | |  |  | | |
| res2 | | .78 |  |  | |  |  | | |
| res3 | | .87 |  |  | |  |  | | |
| res4 | | .88 |  |  | |  |  | | |
| res5 | | .85 |  |  | |  |  | | |
| res6 | | .91 |  |  | |  |  | | |
| TAW |  |  | 4.75 | 0.63 | | 0.75 | 0.53 | | |
| thrivel1 | | .61 |  |  | |  |  | | |
| thrivel2 | | .62 |  |  | |  |  | | |
| thrivel3 | | .72 |  |  | |  |  | | |
| thrivel4 | | -.47 |  |  | |  |  | | |
| thrivel5 | | .73 |  |  | |  |  | | |
| thrivev1 | | .88 |  |  | |  |  | | |
| thrivev2 | | .89 |  |  | |  |  | | |
| thrivev3 | | .66 |  |  | |  |  | | |
| thrivev4 | | .77 |  |  | |  |  | | |
| JS |  |  | 4.75 | 1.32 | | 0.93 | 0.76 | | |
| job1 | | .84. |  |  | |  |  | | |
| job2 | | .91 |  |  | |  |  | | |
| job3 | | .79 |  |  | |  |  | | |
| job4 | | .94 |  |  | |  |  | | |
| Autonomy |  |  | 5.1 | 1.18 | | 0.76 | 0.502 | | |
| aut1 | | .48 |  |  |  | |  | | | | |
| aut2 | | .53 |  |  |  | |  | | | | |
| aut3 | | .75 |  |  |  | |  | | | | |
| aut4 | | .92 |  |  |  | |  | | | | |
| aut5 | | .91 |  | | | |  |  |  | | | |

Note: SD: Standard deviation; CR: Composite reliability; AVE: Average variance extracted; DWO: digital work overload; DSO: digital system overload; DIS: digital innovation support; Resilience: psychological resilience; TAW: Thriving at work; JS: job satisfaction; n = 292

**Table 5** Results of Mediation Analysis Using Bootstrap Estimates

| **Hypothesis** | **Path** | **Std. Coef (β)** | | **95% CI Lower** | **95% CI Uppoer** | **p-value** | **Supported?** |
| --- | --- | --- | --- | --- | --- | --- | --- |
| **H5a** | DWO → DIS → JS | | -0.010 | -0.071 | 0.041 | 0.684 | Not supported |
| **H5b** | DWO → DIS → TAW | | -0.014 | -0.093 | 0.055 | 0.676 | Not supported |
| **H5c** | DSO → DIS → JS | | -0.085 | -0.181 | -0.031 | 0.015 | Partial mediation |
| **H5d** | DSO → DIS → TAW | | -0.114 | -0.229 | -0.051 | 0.005 | Partial mediation |
| **H6a** | DWO → Aut → JS | | 0.021 | -0.008 | 0.068 | 0.221 | Not supported |
| **H6b** | DWO → Aut → TAW | | 0.036 | -0.013 | 0.105 | 0.167 | Not supported |
| **H6c** | DSO → Aut → JS | | 0.006 | -0.031 | 0.047 | 0.738 | Not supported |
| **H6d** | DSO → Aut → TAW | | 0.009 | -0.051 | 0.070 | 0.719 | Not supported |
| **H7a** | DWO → Res → JS | | 0.017 | -0.024 | 0.074 | 0.446 | Not supported |
| **H7b** | DWO → Res → TAW | | 0.009 | -0.015 | 0.045 | 0.502 | Not supported |
| **H7c** | DSO → Res → JS | | -0.052 | -0.130 | -0.008 | 0.066 | Not supported |
| **H7d** | DSO → Res → TAW | | -0.026 | -0.026 | 0.006 | 0.189 | Not supported |

Note: DWO: digital work overload; DSO: digital system overload; DIS: digital innovation support; JS: job satisfaction; TAW: thriving at work. Mediation was tested with 5,000 bootstrap samples (BCa CI). p < .05 values
