# Supplementary material for: Navigating Digital Demands: A Reassessment of Resources for Healthcare Workers’ Workplace Wellbeing
Source: Research Square preprint supplement (doi:10.21203/rs.3.rs-6448853/v1), 2025-05-13
Supplement: Supplementary file 3 [file e4023343067b95815f392568.docx]

**Appendix B: Polychoric Correlations for Construct Indicators**
